# Supplementary material for: Simple fabrication of laser-induced graphene functionalized with a copper-based metal–organic framework and its application in solid-state supercapacitors
Source: Royal Society of Chemistry journal article supplement (doi:10.1039/d4tc00558a), 2024-01-01
Supplement: d4tc00558a1.pdf [file d4tc00558a1.pdf]

## Supplementary Information

### Simple Fabrication of Laser-Induced Graphene Functionalized with a Copper-Based Metal–Organic Framework and its Application in Solid-state Supercapacitors

Samuel Morales-Cámara<sup>a</sup>, Victor Toral<sup>b</sup>, Iñigo J. Vitorica-Yrezabal<sup>a</sup>, Almudena Rivadeneyra<sup>b</sup>, Luis Pereira<sup>c,d</sup>, Sara Rojas<sup>a</sup>, Francisco J. Romero<sup>b,\*</sup>

<sup>a</sup> Department of Inorganic Chemistry, University of Granada, Av. De Fuente Nueva, s/n, 18071, Granada, Spain.

<sup>b</sup> Department of Electronics and Computer Technology, University of Granada, Av. De Fuente Nueva, s/n, 18071, Granada, Spain. Email: franromero@ugr.es

<sup>c</sup> AlmaScience Colab, 2829-516 Caparica, Portugal.

<sup>d</sup> CENIMAT/i3N, Department of Materials Science, School of Science and Technology, NOVA University Lisbon and CEMOP/UNINOV, 2829-516 Caparica, Portugal.

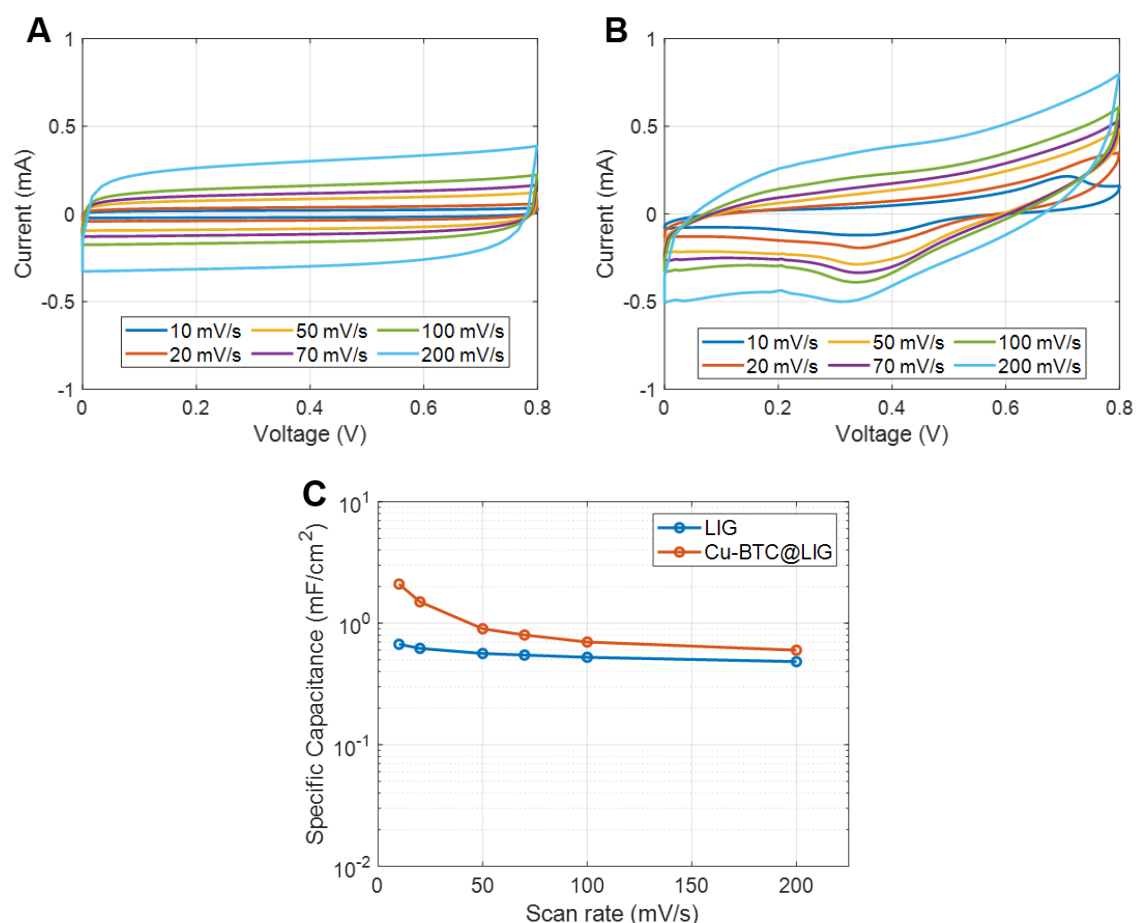

**Fig. S1.** Additional Cyclic Voltammetry (CV) experiments for an IDE structure with the following characteristics: number total of fingers  $N = 13$ , width of the fingers  $W = 1$  mm, spacing between electrodes  $S = 0.5$   $\mu\text{m}$ , interspacing between fingers  $i = 0.5$   $\mu\text{m}$  and length of the fingers  $L = 11$  mm. (A) CV curves at different scan rates for the LIG electrodes. (B) CV curves at different scan rates for the Cu-BTC@LIG electrodes. (D) Specific capacitance as a function of the scan rate for both LIG and Cu-BTC@LIG electrodes.

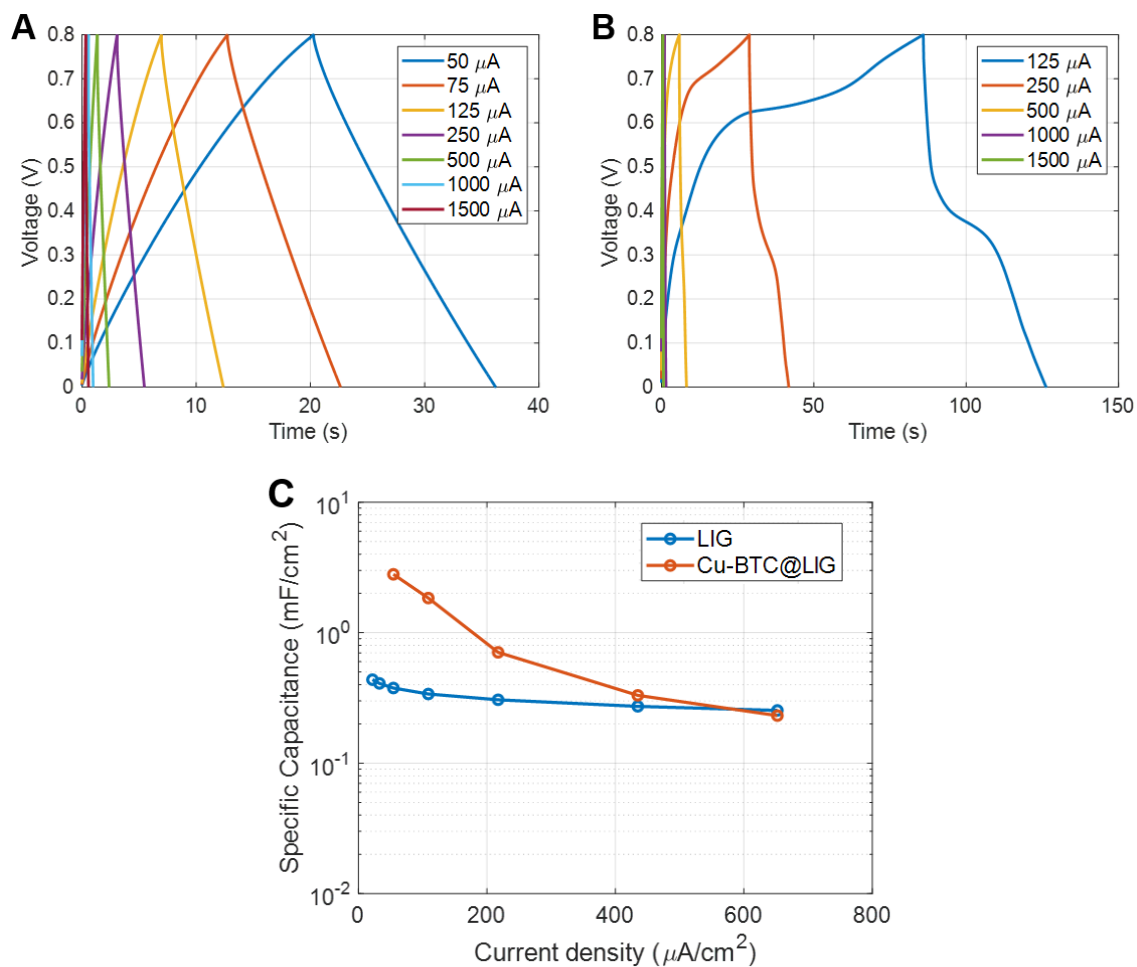

**Fig. S2.** Additional Galvanometric charge-discharge curves at different constant currents for an IDE structure with the following characteristics: number total of fingers  $N = 13$ , width of the fingers  $W = 1$  mm, spacing between electrodes  $S = 0.5 \mu\text{m}$ , interspacing between fingers  $i = 0.5 \mu\text{m}$  and length of the fingers  $L = 11$  mm. (A) Curves at different constant currents for the LIG electrodes. (B) Curves at different constant currents for the Cu-BTC@LIG electrodes. (C) Specific capacitance as a function of the current density for both LIG and Cu-BTC@LIG electrodes.

**Table S1.** Specific capacitance before and after the LIG functionalization with different materials.

| LIG Functionalizer   | Electrolyte                              | $C_A$ (mF/cm <sup>2</sup> ) (before) | $C_A$ (mF/cm <sup>2</sup> ) (after)                          | Reference |
|----------------------|------------------------------------------|--------------------------------------|--------------------------------------------------------------|-----------|
| Cu-BTC               | PVA/H <sub>3</sub> PO <sub>4</sub>       | 0.37 @ 54.3 $\mu\text{A cm}^{-2}$    | 2.8 @ 54.3 $\mu\text{A cm}^{-2}$                             | This work |
| Cu                   | PVA/KOH                                  | 0.8 @ 100 mV s <sup>-1</sup>         | 1.1 @ 100 mV s <sup>-1</sup>                                 | 13        |
| Ag                   |                                          |                                      | 1.2 @ 100 mV s <sup>-1</sup>                                 |           |
| MoS <sub>2</sub>     | PVP+NaCl                                 | -                                    | 14 @ 10 mV s <sup>-1</sup>                                   | 78        |
| MnO <sub>2</sub>     | PVA/H <sub>3</sub> PO <sub>4</sub>       | -                                    | 18.82 at 200 $\mu\text{A}/\text{cm}^2$                       | 84        |
| B                    | PVA/H <sub>2</sub> SO <sub>4</sub>       | 5.5 @ 50 $\mu\text{A cm}^{-2}$       | 16.5 @ 50 $\mu\text{A cm}^{-2}$                              | 85        |
| SnO <sub>2</sub>     | PVA/H <sub>2</sub> SO <sub>4</sub>       | 3.59 @ 10 mV s <sup>-1</sup>         | 18.58 @ 10 mV/s                                              | 88        |
| LIG-ZIF-67           | PVA/H <sub>2</sub> SO <sub>4</sub>       | 2 @ 500 $\mu\text{A cm}^{-2}$        | 3 @ 500 $\mu\text{A cm}^{-2}$                                | 29        |
| LIG-(MOF-199@ZIF-67) | H <sub>2</sub> SO <sub>4</sub> (aqueous) | -                                    | 6.2 @ 10 mV s <sup>-1</sup><br>5 @ 200 $\mu\text{A cm}^{-2}$ | 27        |
